# Supplementary material
Source: MDPI journal article supplement (https://www.mdpi.com/2673-933X/2/4/29)
Supplement: s1 [file s1]

Archive with 1 entries (1 files):
- ruminants-1970417-supplementary.pdf
