# Supplementary material
Source: MDPI journal article supplement (https://www.mdpi.com/2673-933X/2/4/29)
Supplement: s1 [file s1 › ruminants-1970417-supplementary.pdf]

# **Effect of Growth Hormone Exon-5 Polymorphism on Growth Traits, Body Measurements, Slaughter and Carcass Characteristics, and Meat Quality in Meat-Type Lambs in Turkey**

**Vasfiye Kader Esen <sup>1,\*</sup> and Cengiz Elmacı <sup>2</sup>**

<sup>1</sup> Department of Breeding and Genetics, Sheep Breeding Research Institute, Balıkesir 10200, Turkey

<sup>2</sup> Department of Animal Science, Faculty of Agriculture, Uludağ University, Bursa 16059, Turkey

\*Correspondence: [vasfiye.esen@gmail.com](mailto:vasfiye.esen@gmail.com)

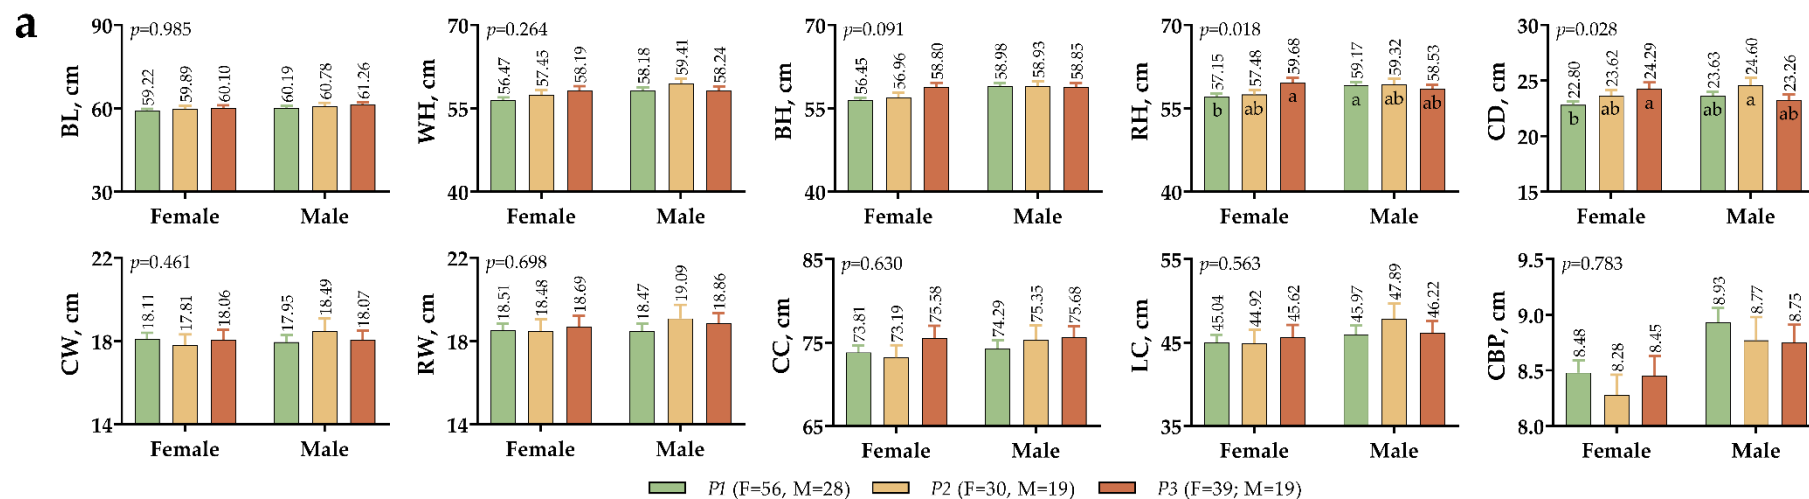

**Figure S1.** Effect of *GHE5* polymorphism on body measurements at different periods in meat-type lambs. a: Body measurements on the 90<sup>th</sup> day; BL: Body length; WH: Withers height; BH: Back height; RH: Rump height; CD: Chest depth; CW: Chest width; RW: Rump width; CC: Chest circumference; LC: Leg circumference; CBP: Cannon bone perimeter; F: Female; M: Male. The values with different letters (a,b) in each graph are statistically different ( $p < 0.05$ ).

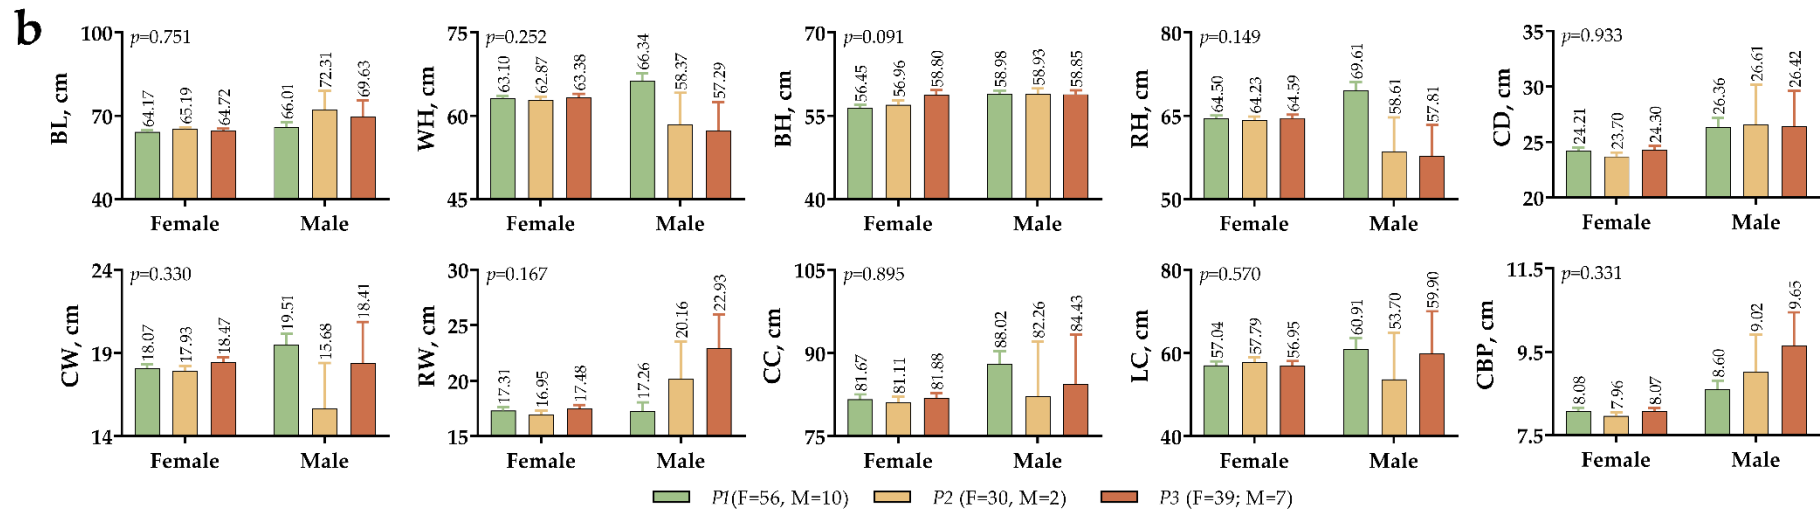

**Figure S1 continued.** Effect of *GHE5* polymorphism on body measurements at different periods in meat-type lambs. b: Body measurements on the 180<sup>th</sup> day; BL: Body length; WH: Withers height; BH: Back height; RH: Rump height; CD: Chest depth; CW: Chest width; RW: Rump width; CC: Chest circumference; LC: Leg circumference; CBP: Cannon bone perimeter; F: Female; M: Male. The values with different letters (a,b) in each graph are statistically different ( $p < 0.05$ ).

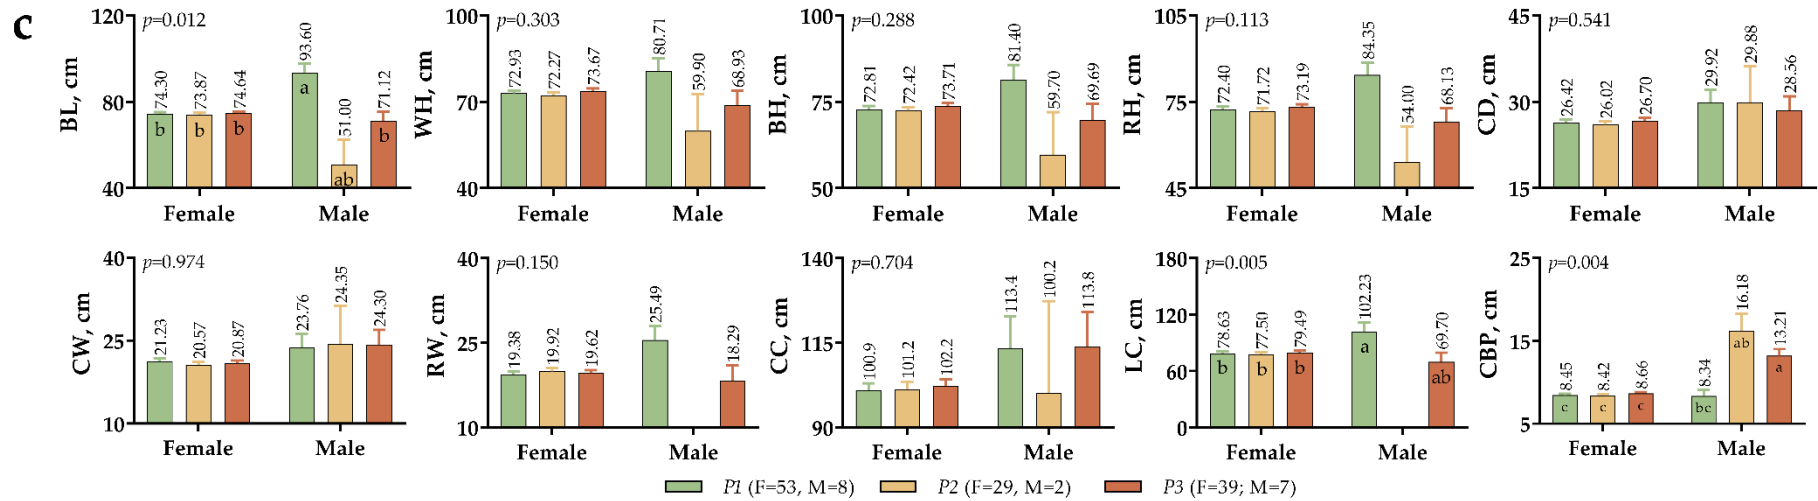

**Figure S1 continued.** Effect of *GHE5* polymorphism on body measurements at different periods in meat-type lambs. c: Body measurements on the 360<sup>th</sup> day; BL: Body length; WH: Withers height; BH: Back height; RH: Rump height; CD: Chest depth; CW: Chest width; RW: Rump width; CC: Chest circumference; LC: Leg circumference; CBP: Cannon bone perimeter; F: Female; M: Male. The values with different letters (a-c) in each graph are statistically different ( $p < 0.05$ ).
